# Supplementary material for: Positive Association between Preserved C-Peptide and Cognitive Function in Pregnant Women with Type-1 Diabetes
Source: MDPI journal article supplement (doi:10.3390/biomedicines10112785), 2022-11-02
Supplement: s1 [file s1]

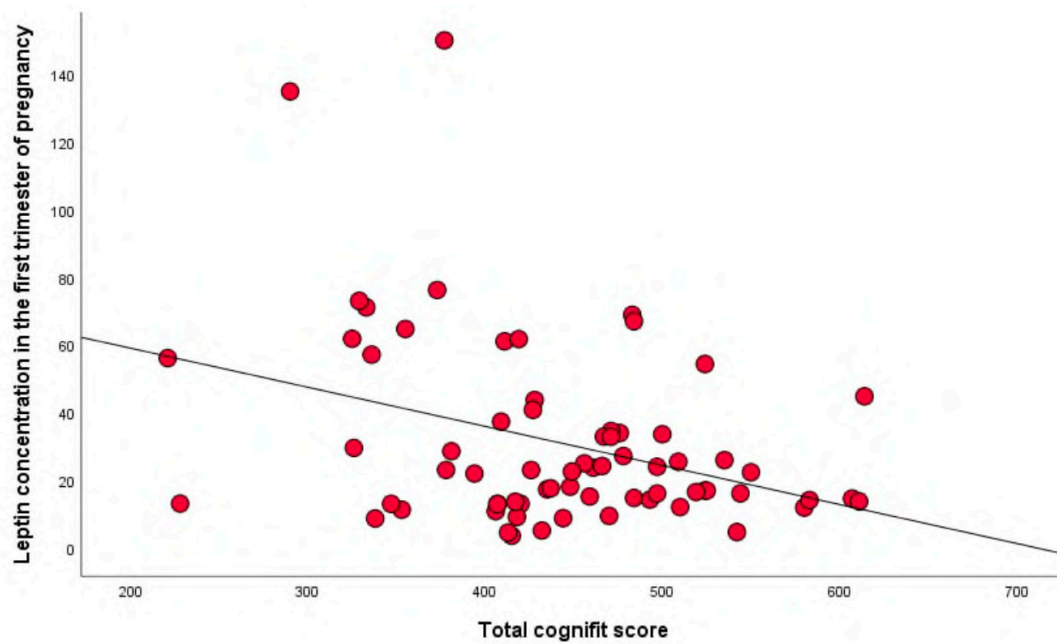

**Figure S1.** Linear correlation between total cognitive function (score) and leptin concentration in the first trimester of pregnancy ( $r = -0.349$ ,  $p = 0.001$ ).

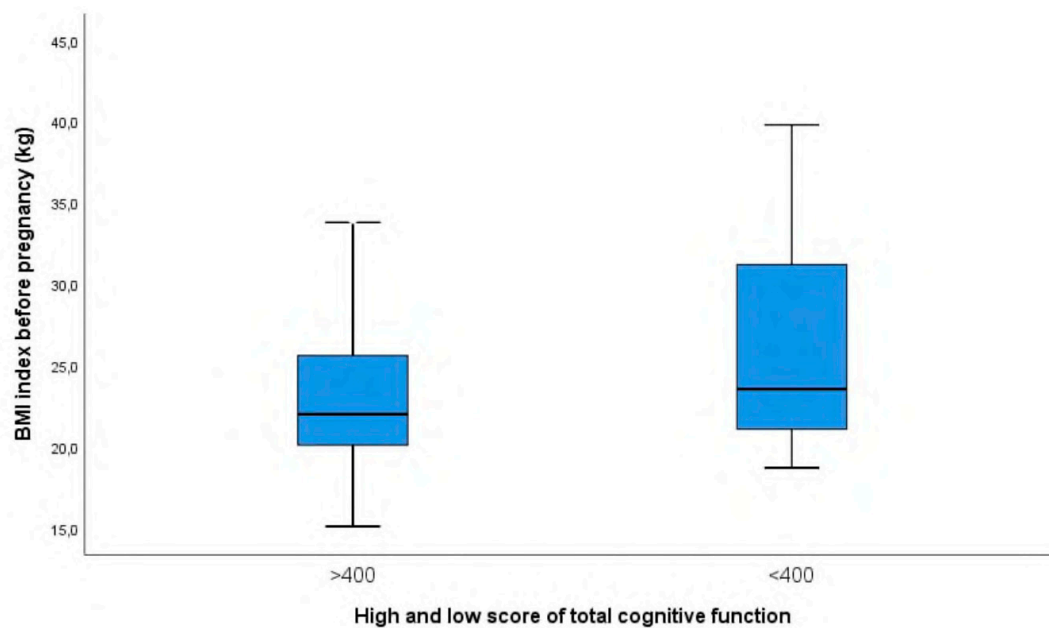

**Figure S2.** Presentation of mean values with SD of BMI in groups of pregnant women with a higher score ( $23.4 \pm 4.7 \text{ kg/m}^2$ ) and with a low score ( $26.2 \pm 5.7 \text{ kg/m}^2$ ) for total cognitive function.

**Table S1.** Characteristics of studies used in the meta-analysis.

|                                     |                             | Cognitive score<br>>400 | Cognitive score<br><400 |
|-------------------------------------|-----------------------------|-------------------------|-------------------------|
| Age (years)                         | <30                         | 23                      | 7                       |
|                                     | >30                         | 35                      | 13                      |
| Age of onset of T1DM<br>(years)     | Before 10                   | 21                      | 7                       |
|                                     | After 10                    | 37                      | 13                      |
| Duration T1DM (years )              | <8                          | 18                      | 5                       |
|                                     | >8                          | 40                      | 15                      |
| BMI (kg/m <sup>2</sup> )            | <25                         | 42                      | 11                      |
|                                     | >25                         | 13                      | 12                      |
| HbA1c in 1st trimester (%)          | <6.5                        | 25                      | 11                      |
|                                     | >6.5                        | 28                      | 9                       |
| Hypothyroidism                      | NO                          | 32                      | 4                       |
|                                     | YES                         | 22                      | 16                      |
| C-peptide 1st trimester<br>(pmol/L) | YES                         | 35                      | 7                       |
|                                     | NO                          | 2                       | 11                      |
| CAN                                 | NO                          | 35                      | 7                       |
|                                     | YES                         | 20                      | 12                      |
| Education                           | High and University. degree | 26                      | 10                      |
|                                     | High school                 | 28                      | 14                      |
| CGM > 7.8 mmol/L                    | <7.8                        | 36                      | 10                      |
|                                     | >7.8                        | 12                      | 7                       |
| CGM < 3.9 mmol/L                    | <3.9                        | 12                      | 7                       |
|                                     | >3.9                        | 36                      | 10                      |
